# Supplementary material
Source: PubMed Central journal article supplement (PMC5147500)

**A****VPS35**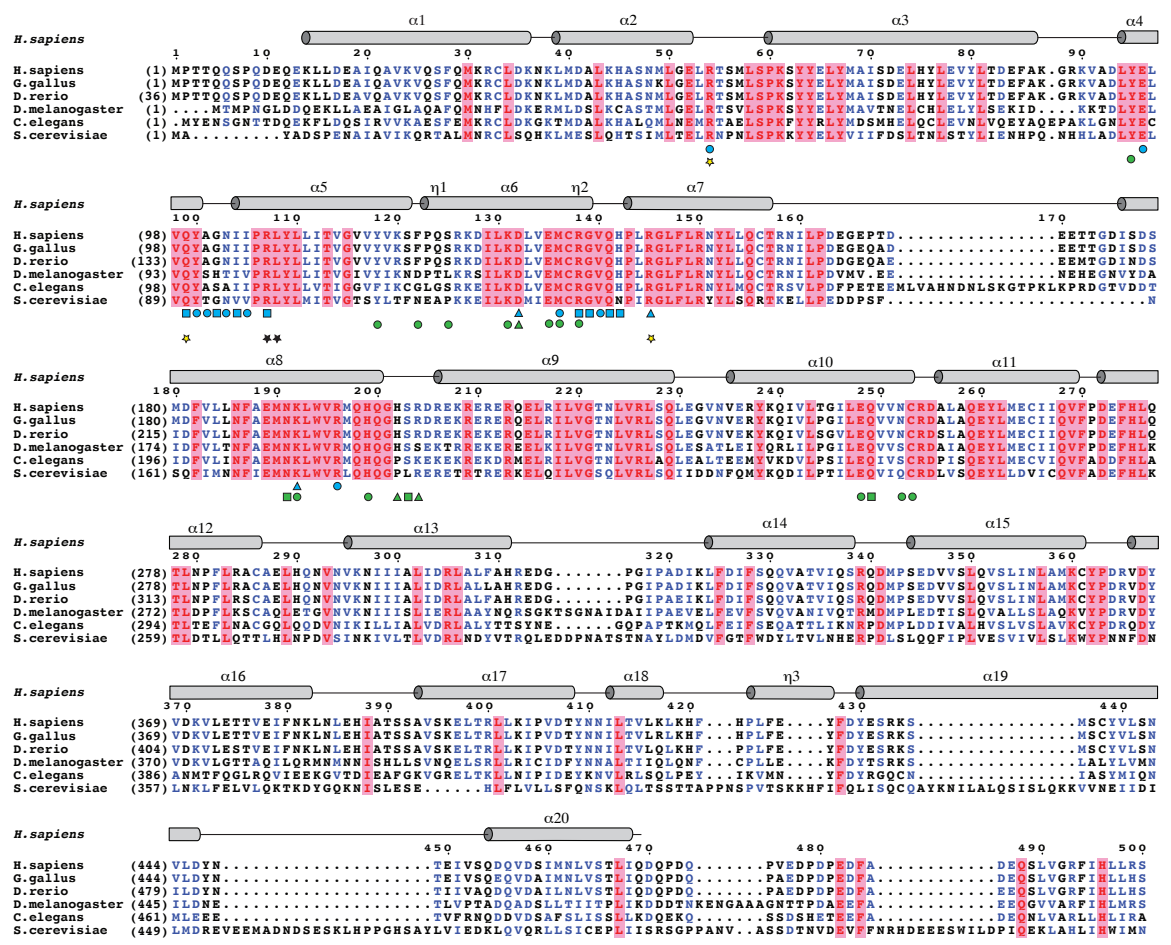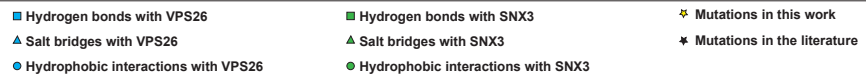**B****VPS26**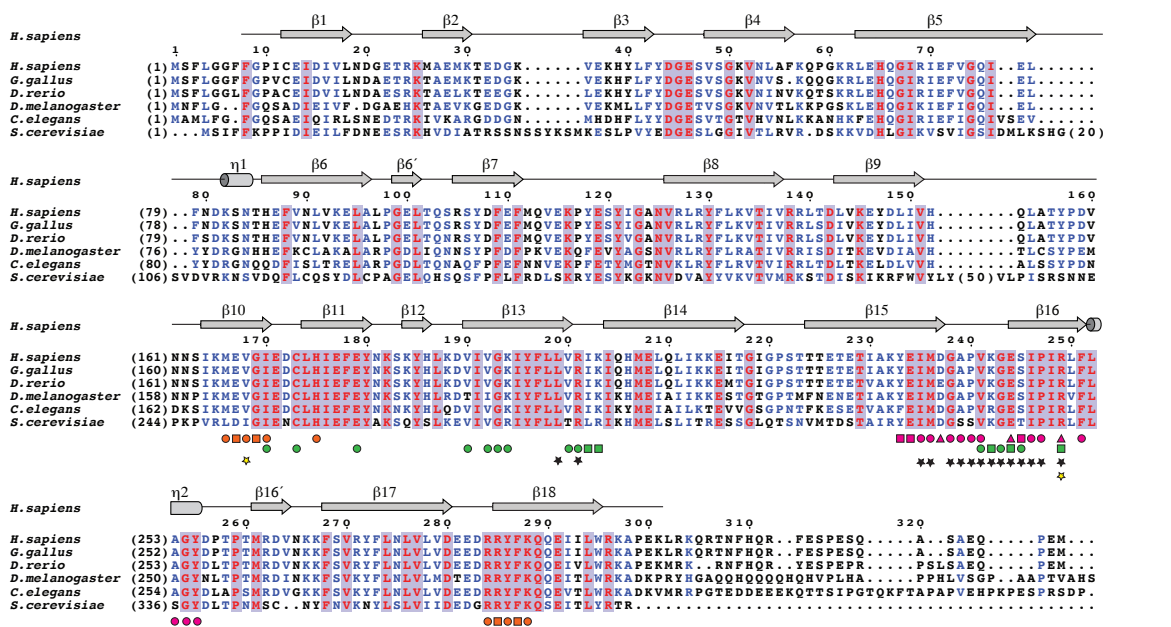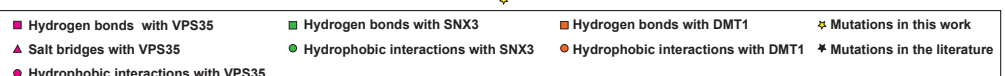

Supplement: NIHMS827513-supplement-3.pdf [file NIHMS827513-supplement-3.pdf]

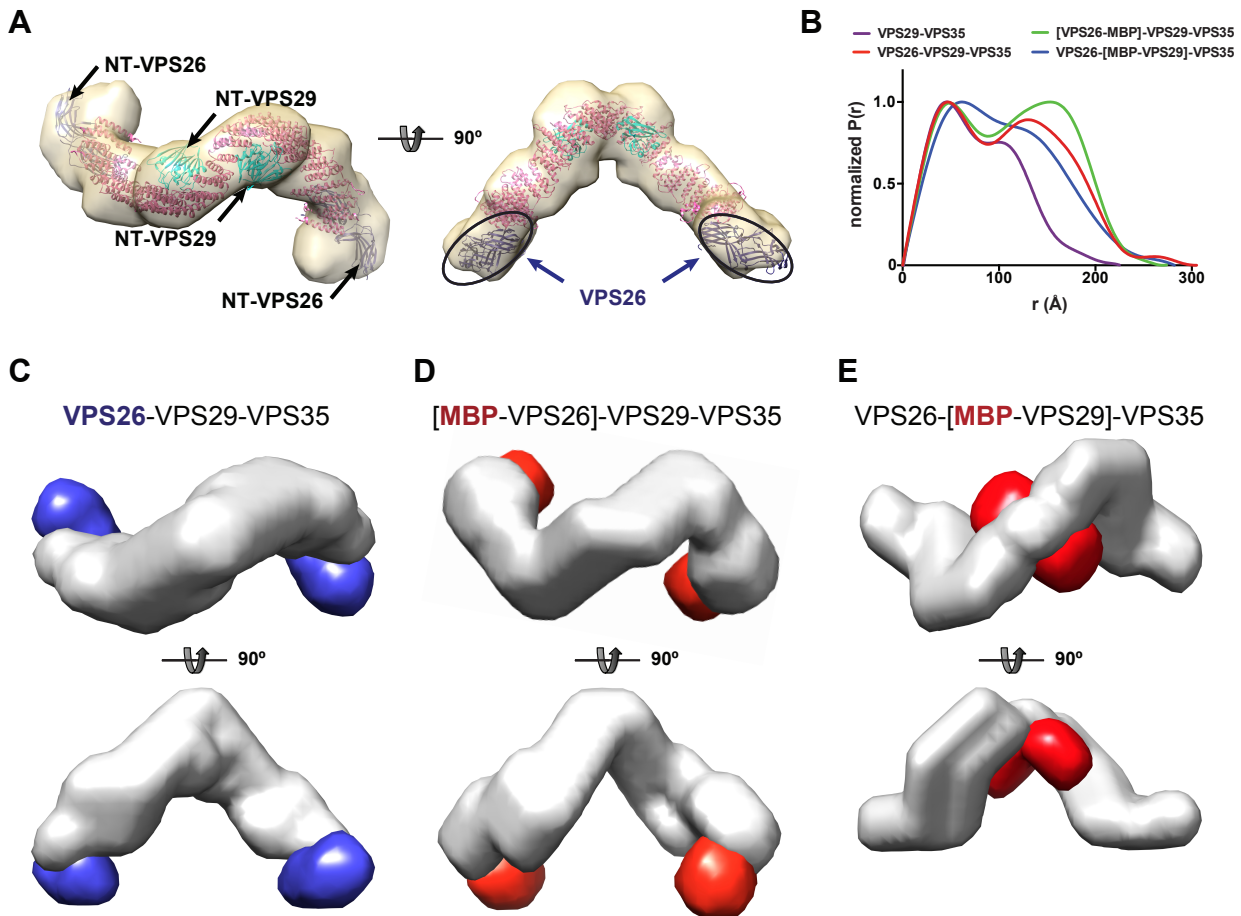

Supplement: NIHMS827513-supplement-4.pdf [file NIHMS827513-supplement-4.pdf]

# SNX3

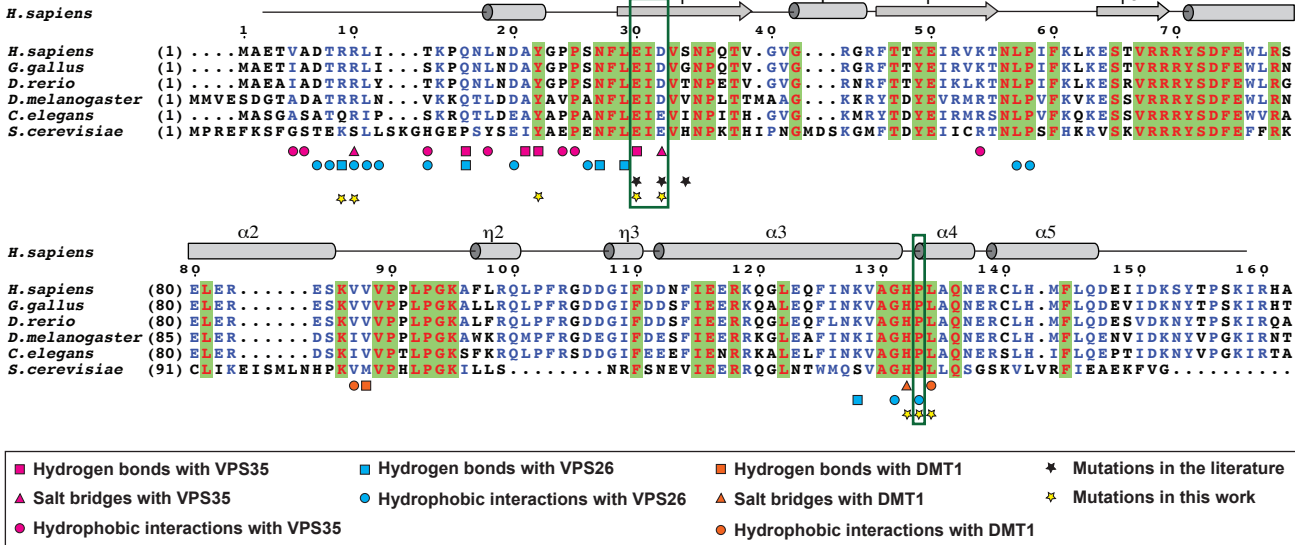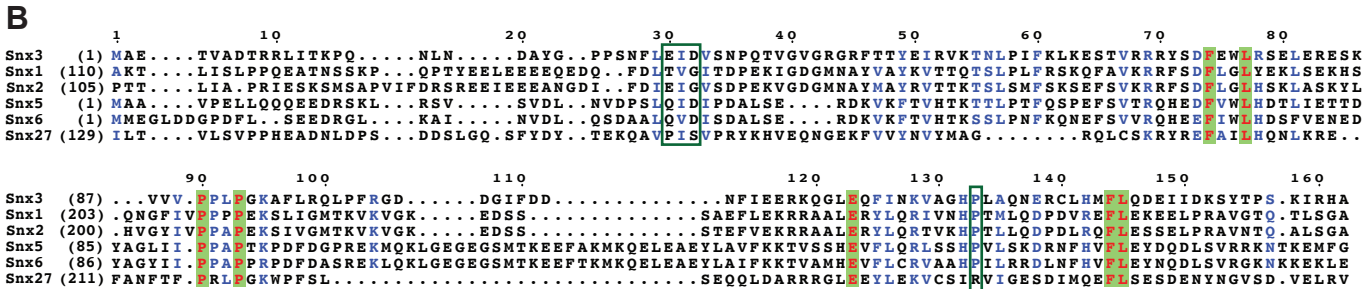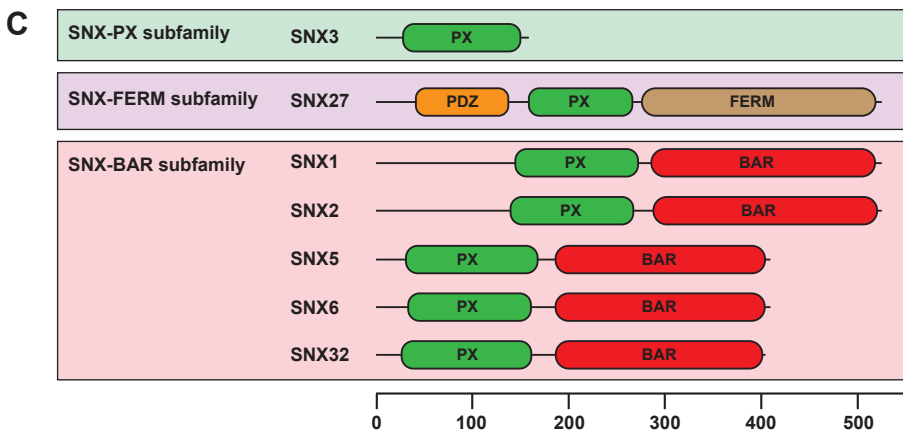

Supplement: NIHMS827513-supplement-5.pdf [file NIHMS827513-supplement-5.pdf]

**A**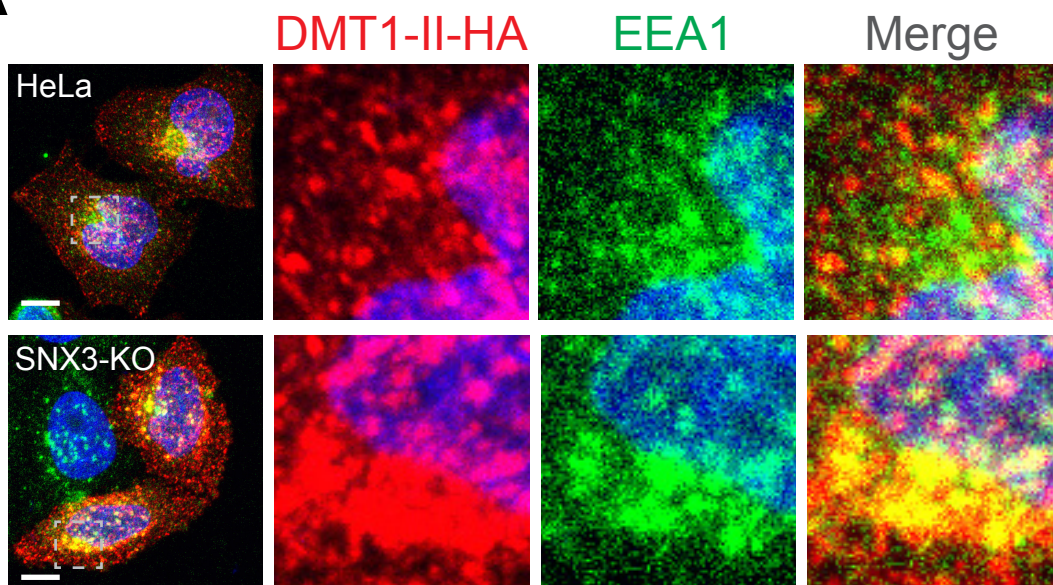**B**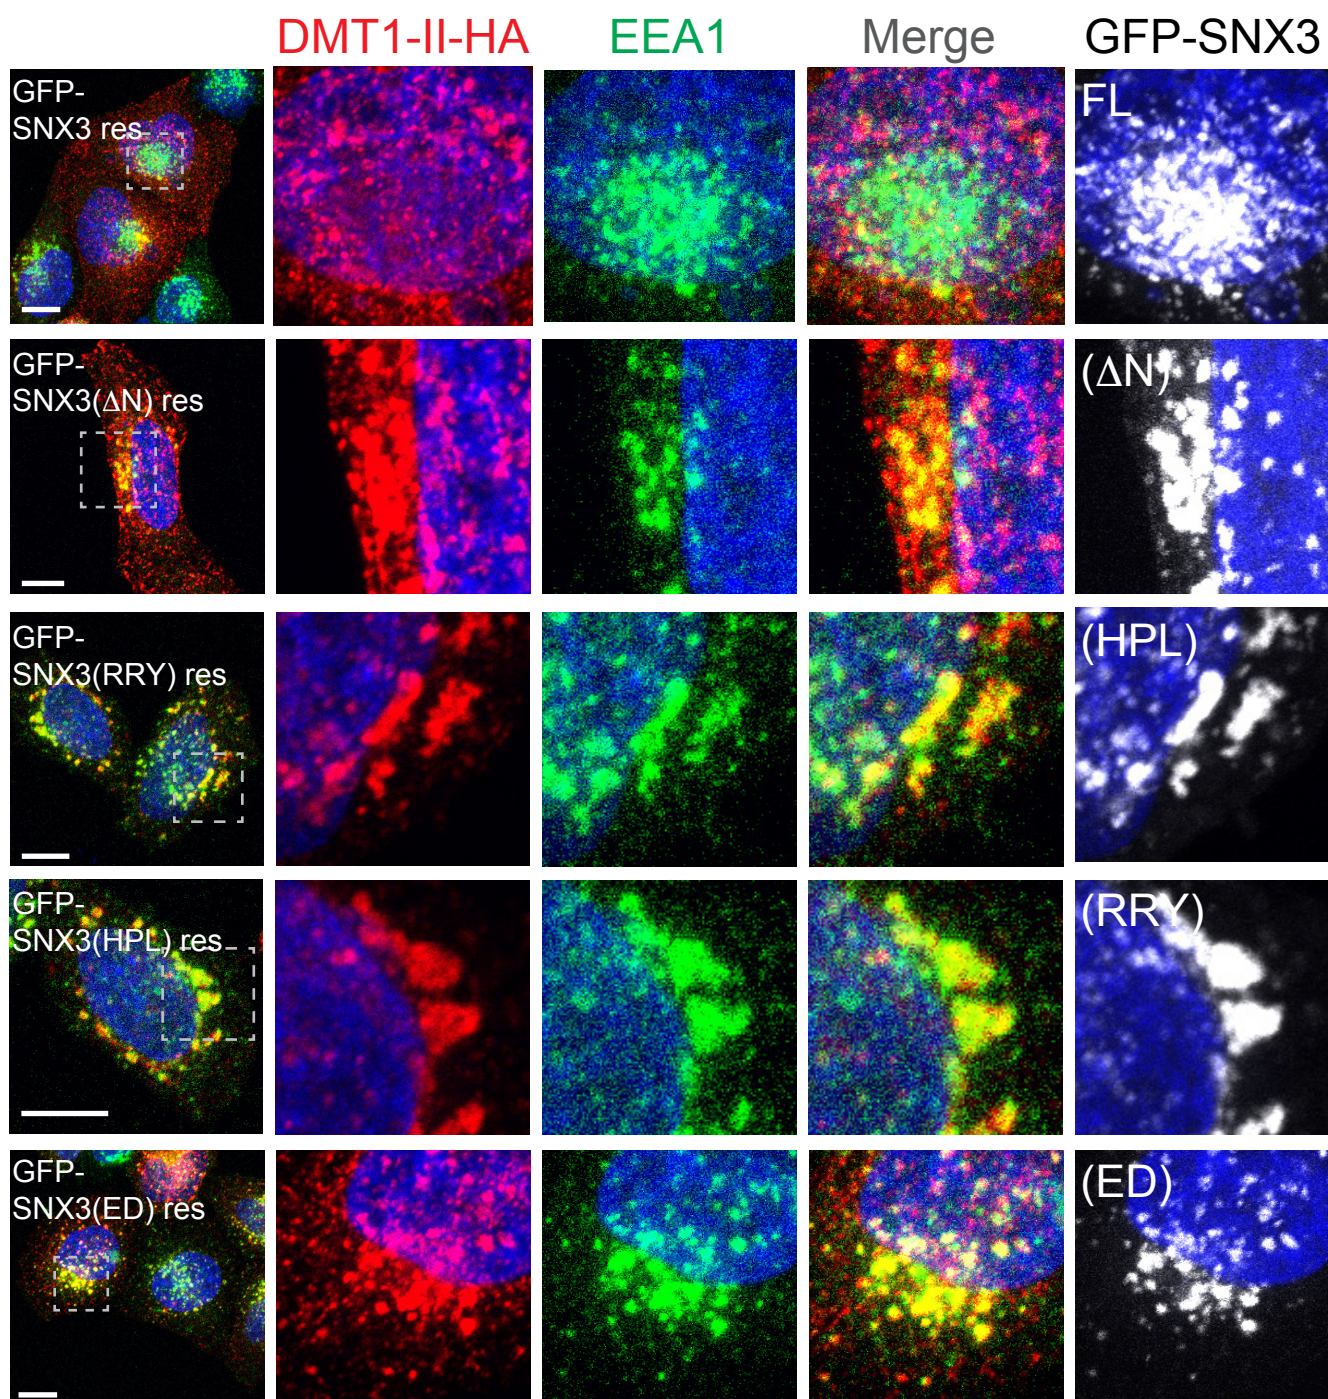

Supplement: NIHMS827513-supplement-7.pdf [file NIHMS827513-supplement-7.pdf]
